# Supplementary material for: Differing Expression and Potential Immunological Role of C-Type Lectin Receptors of Two Different Chicken Breeds against Low Pathogenic H9N2 Avian Influenza Virus
Source: MDPI journal article supplement (doi:10.3390/pathogens13010095), 2024-01-22
Supplement: s1 [file s1]

**Table S1.** Primer sets used for quantification of chicken C-type lectin, OASL, and MX1 mRNA level.

| <b>Target gene<br/>(GenBank Acc. No.)</b> | <b>Forward primer</b>              | <b>Reverse primer</b>         | <b>Size</b> |
|-------------------------------------------|------------------------------------|-------------------------------|-------------|
| chC-lectin<br>(CR391386.1)                | TCACCAACTGGTTT-<br>GAGCTG          | GCAGACCCAGTGCTT-<br>GTGTA     | 101         |
| chMx1<br>(NM_204609)                      | GGAGCAAGTAAAC-<br>GCCTGAG          | TCTGCTGGTTAG-<br>CAGCTTCA     | 163         |
| chOASL<br>(NM_205041)                     | GCGGTCTACGTGAA-<br>GCTGTT          | TTCGGCTTCAACATCTC<br>CTT      | 158         |
| chGAPDH<br>(NM_204305)                    | CCCAG-<br>CAACATCAAATGGG-<br>CAGAT | TGATAACACGCTTAG-<br>CACCACCCT | 118         |

**Table S2.** Primer sets used for C-type lectin receptors cloning to pcDNA3.1 vectors.

| <b>Target gene<br/>(GenBank Acc. No.)</b> | <b>Forward primer</b>                             | <b>Reverse primer</b>           | <b>Size</b> |
|-------------------------------------------|---------------------------------------------------|---------------------------------|-------------|
| C-type lectin                             | CGGATCCGCCGCCAC-<br>CATGCAGTCTGTG-<br>CAAATACCAAT | AGAATTCTTGTGGGTG-<br>CACCTTTTGC | 841         |
